# Supplementary material for: Inhibition of Amyloid Beta Aggregation and Deposition of Cistanche tubulosa Aqueous Extract
Source: PubMed Central journal article supplement (PMC6412839; doi:10.3390/molecules24040687), 2019-02-14
Supplement: molecules-24-00687-s001.pdf [file molecules-24-00687-s001.pdf]

## Supporting Information

# Inhibition of amyloid beta aggregation and deposition of *Cistanche tubulosa* aqueous extract

Chien-Liang Chao <sup>1</sup>, Hsin-Wen Huang <sup>1</sup>, Hui-Chi Huang <sup>2</sup>, Hsin-Fan Chao <sup>1</sup>, Shuen-Wen Yu <sup>1</sup>, Muh-Hwan Su <sup>1,3</sup>, Chao-Jih Wang <sup>1,4\*</sup> and Hang-Ching Lin <sup>1,3\*</sup>

<sup>1</sup> Sinphar Pharmaceutical Co., Ltd., Sinphar group, Yilan 269, Taiwan; chaokmc@gmail.com (C.-L.C.); lobar@sinphar.com.tw (H.-W.H); hfchao@sinphar.com.tw (H.-F.C); ysw@sinphar.com.tw (S.-W.Y); smh1027@sinphar.com.tw (M.-H.S); hcl@sinphar.com.tw (H.-C.L)

<sup>2</sup> Department of Chinese Pharmaceutical Sciences and Chinese Medicine Resources, China Medical University, Taichung 404, Taiwan; hchuang@mail.cmu.edu.tw

<sup>3</sup> School of Pharmacy, National Defense Medical Center, Taipei 114, Taiwan; [smh1027@sinphar.com.tw](mailto:smh1027@sinphar.com.tw) (M.-H.S); hcl@sinphar.com.tw (H.-C.L)

<sup>4</sup> Sinphar Tian-Li Pharmaceutical Co., Ltd., Sinphar group, Hangzhou 311100, China; zrwang@sinphar.com.tw

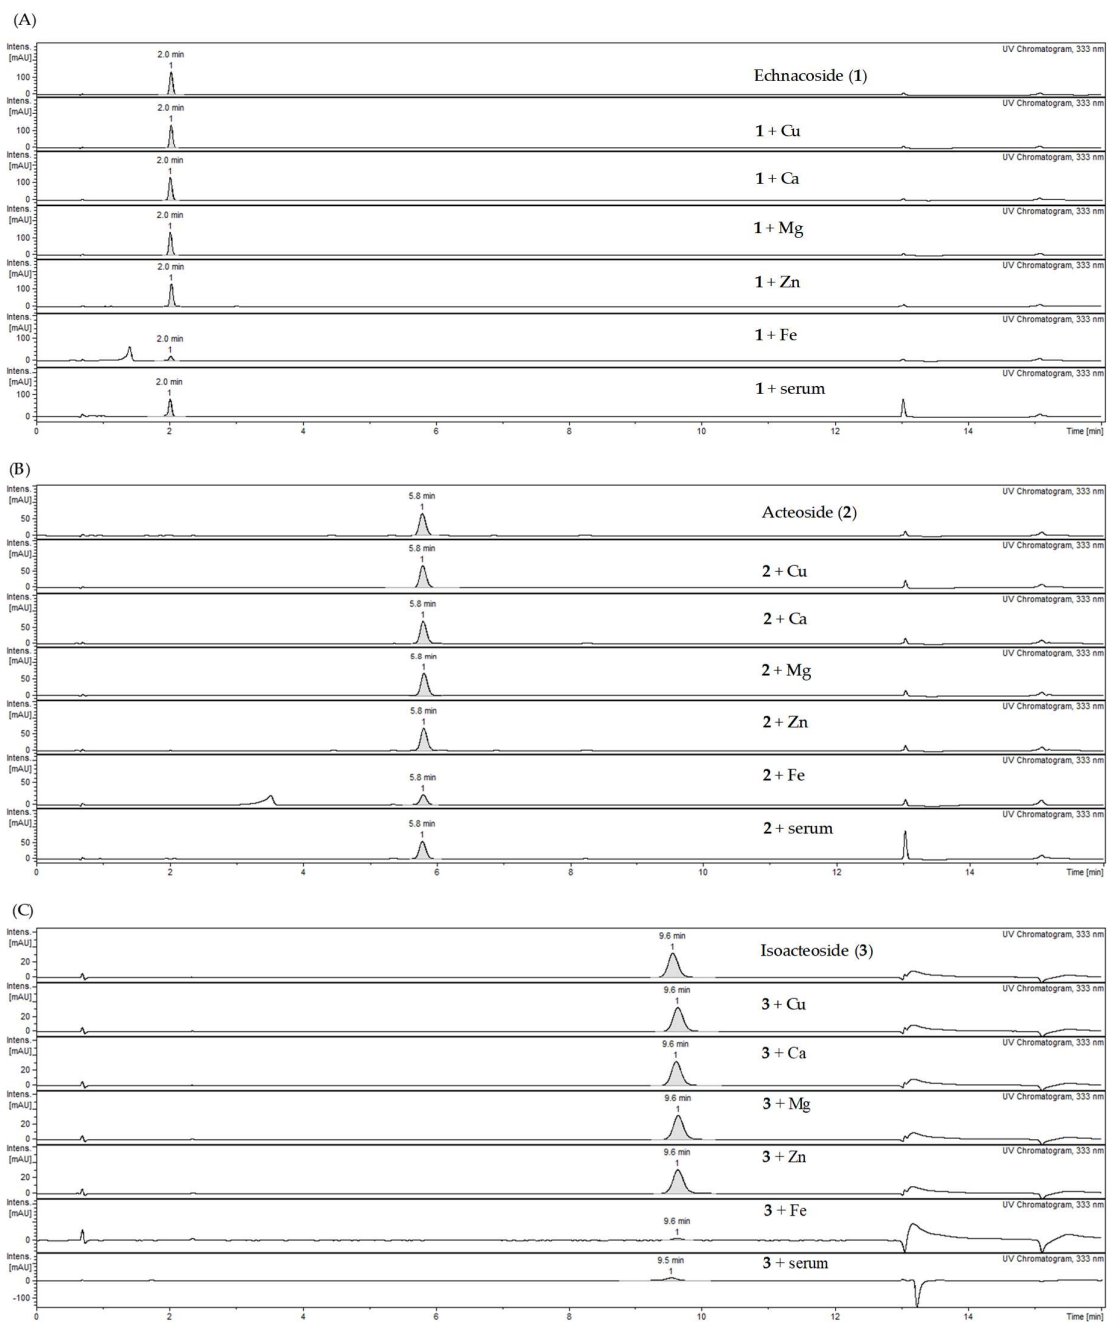

**Figure 1S.** Measure of chelation activity retained for the phenylethanoid glycosides, (a) compound **1**, (b) compound **2** and (c) compound **3** in the presence of copper (Cu), calcium (Ca), magnesium (Mg), zinc (Zn), iron (Fe), and rat serum by UPLC analysis. The data represented mean  $\pm$  S.D.,  $n=3$ . \*\*\* $p<0.001$ .

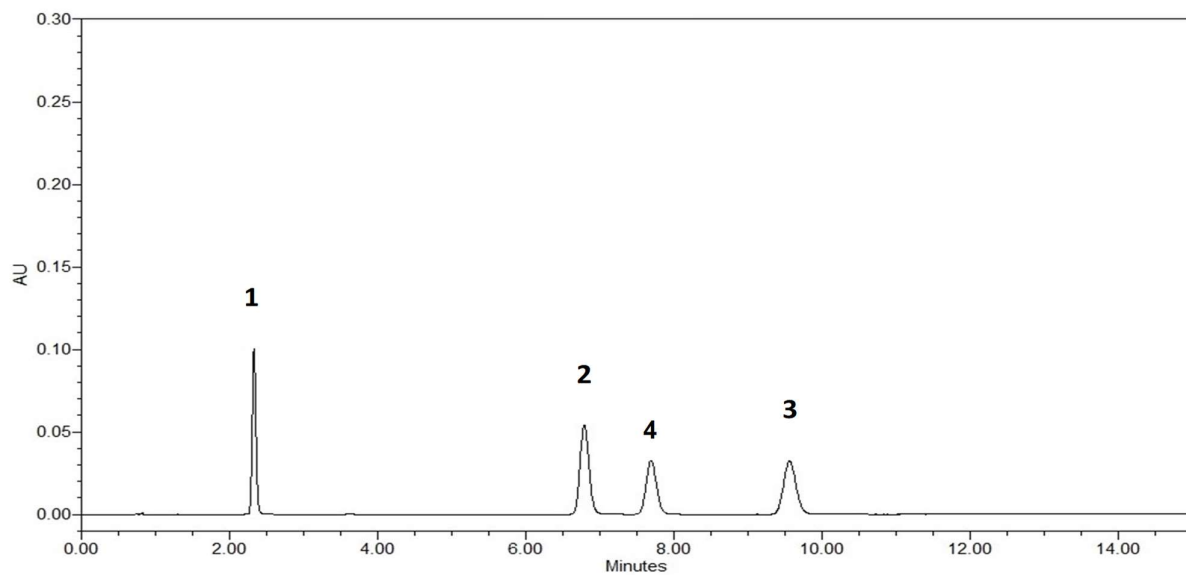

**Figure 2S.** The UPLC chromatogram of CTE. Echinacoside (1), acteoside (2), isoacteoside (3), and tubuloside A (4) were the components of CTE.

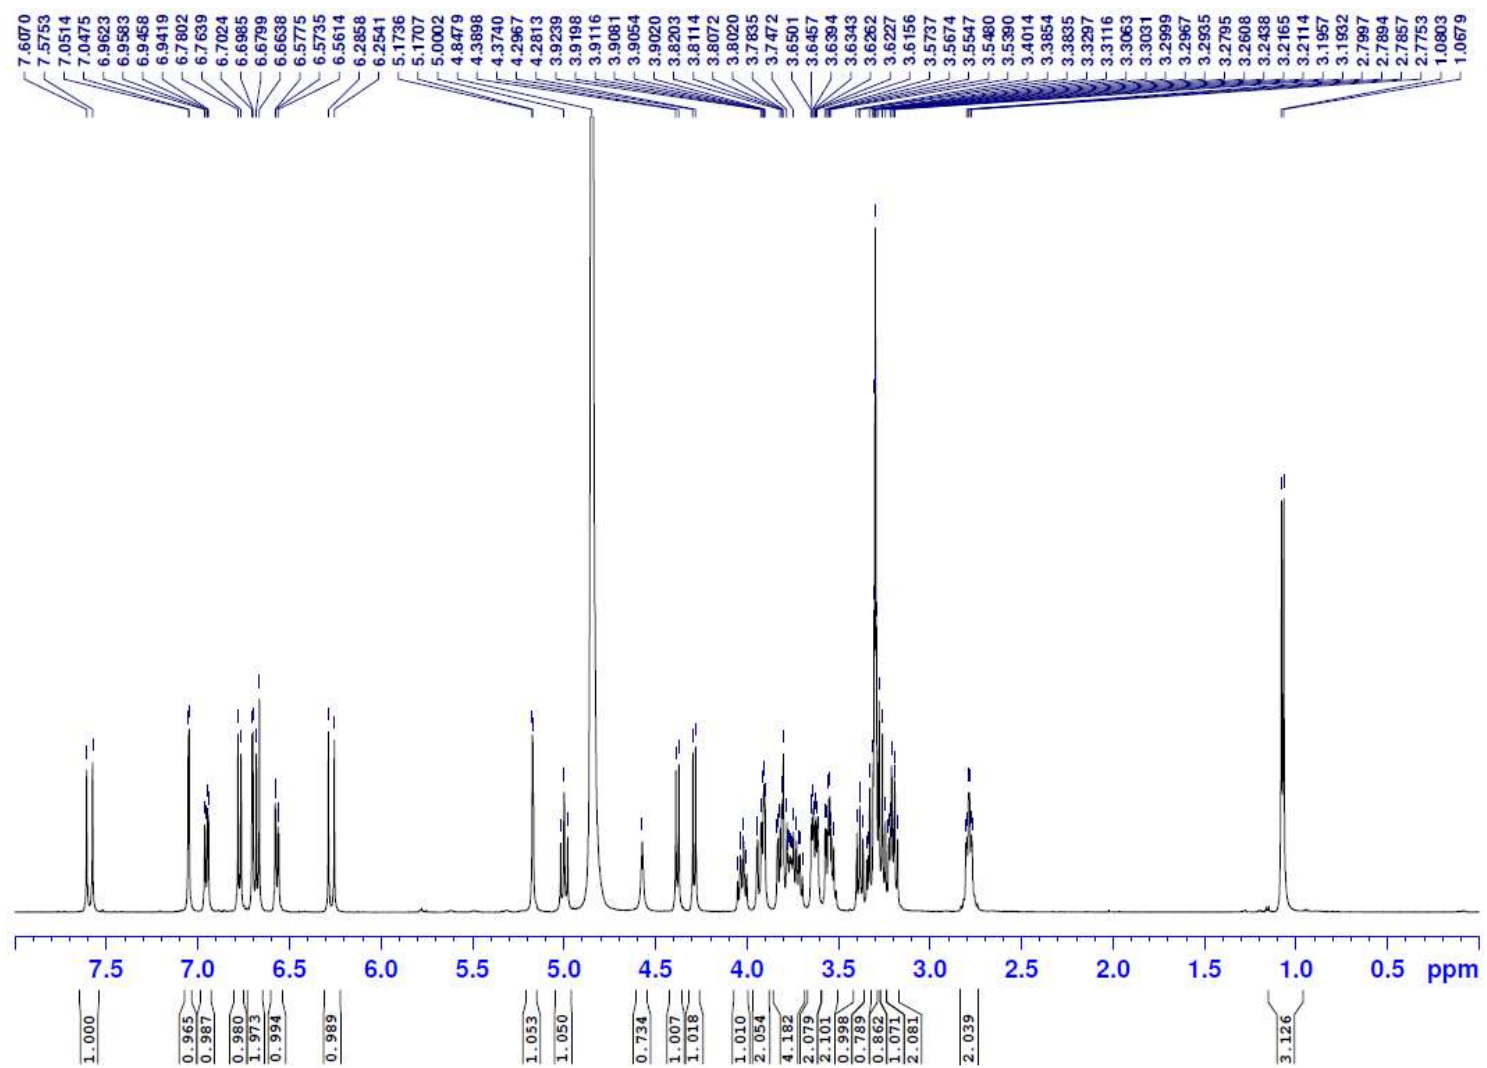

Figure 3S. The  $^1\text{H}$  NMR (500 MHz,  $\text{CDCl}_3$ ) data of **1**

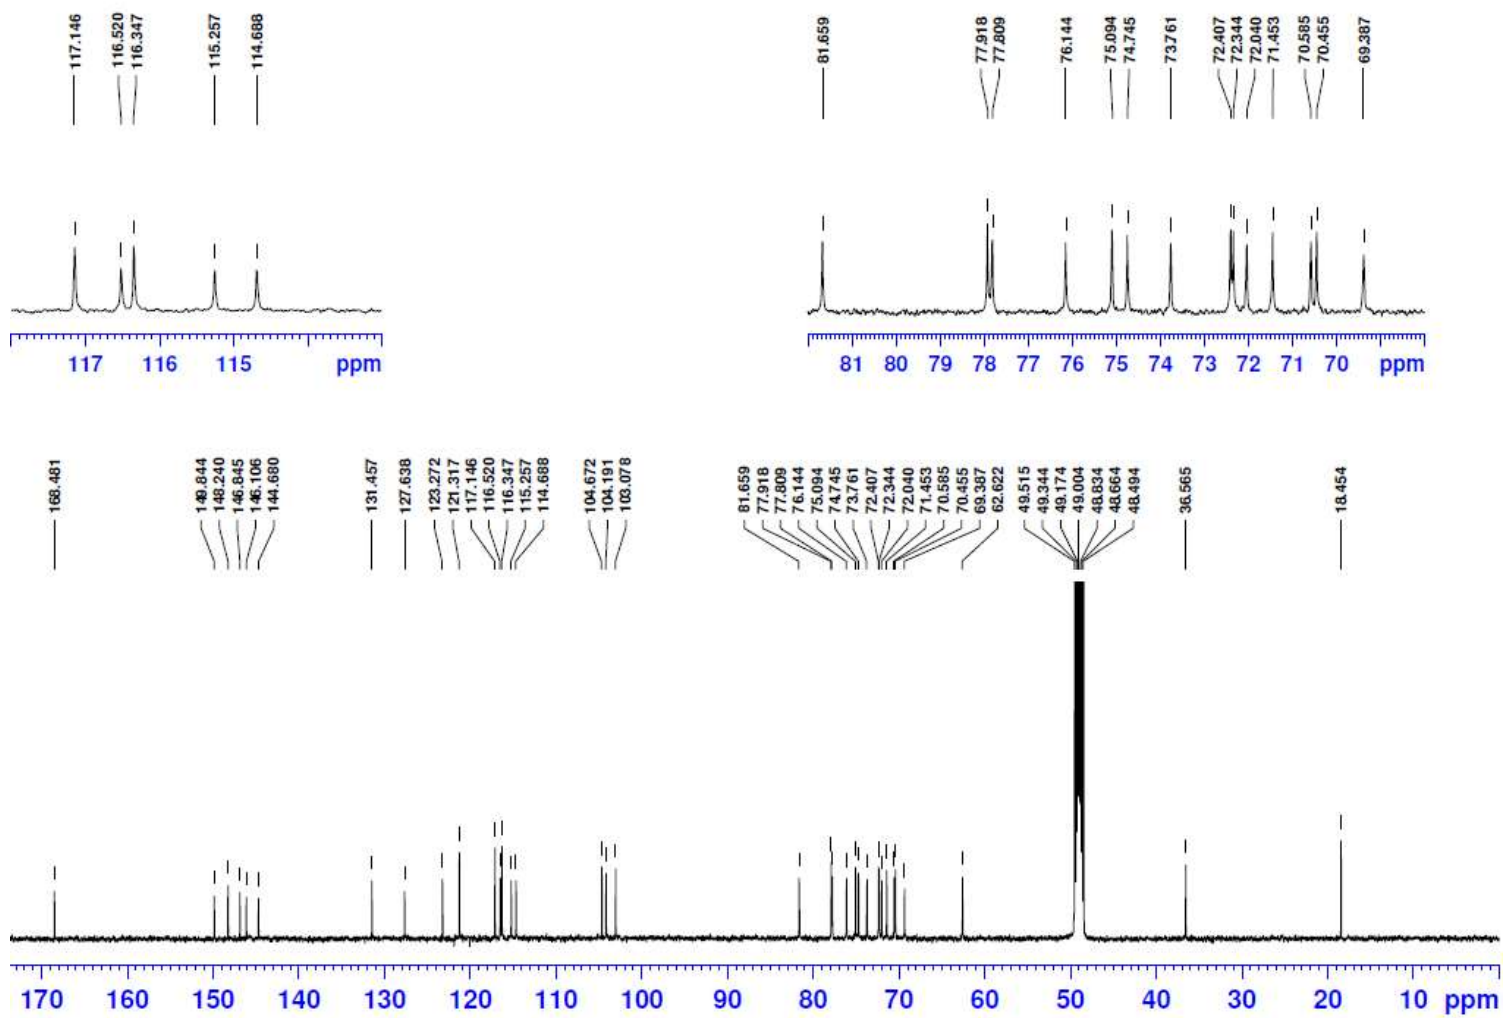

Figure 4S. The <sup>13</sup>C NMR (125 MHz, CDCl<sub>3</sub>) data of 1

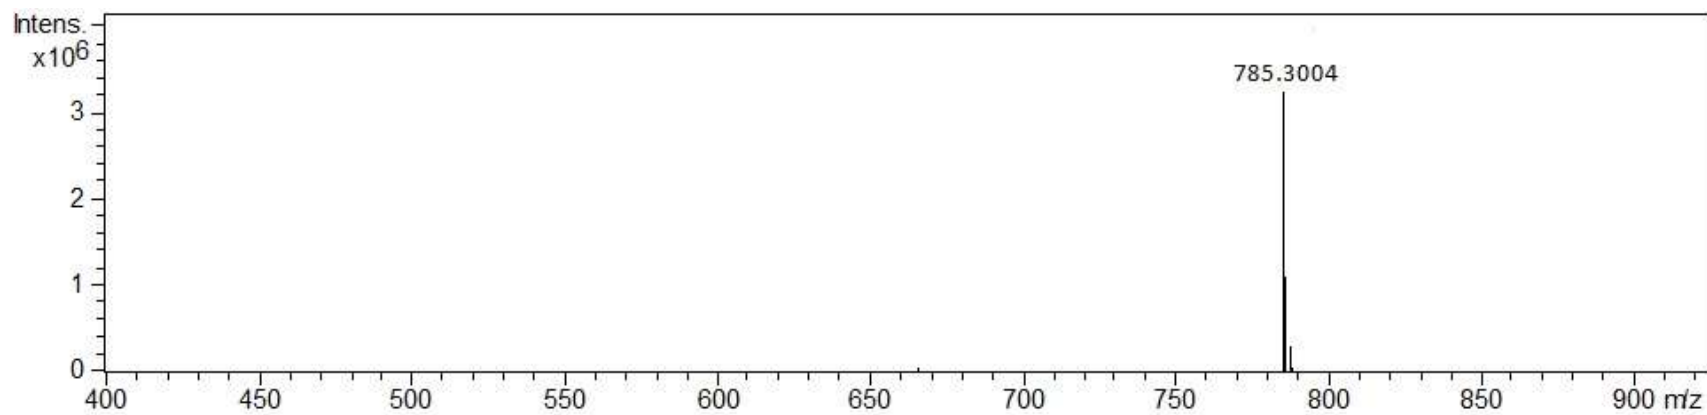

**Figure 5S.** The ESI-MS spectrum of **1**

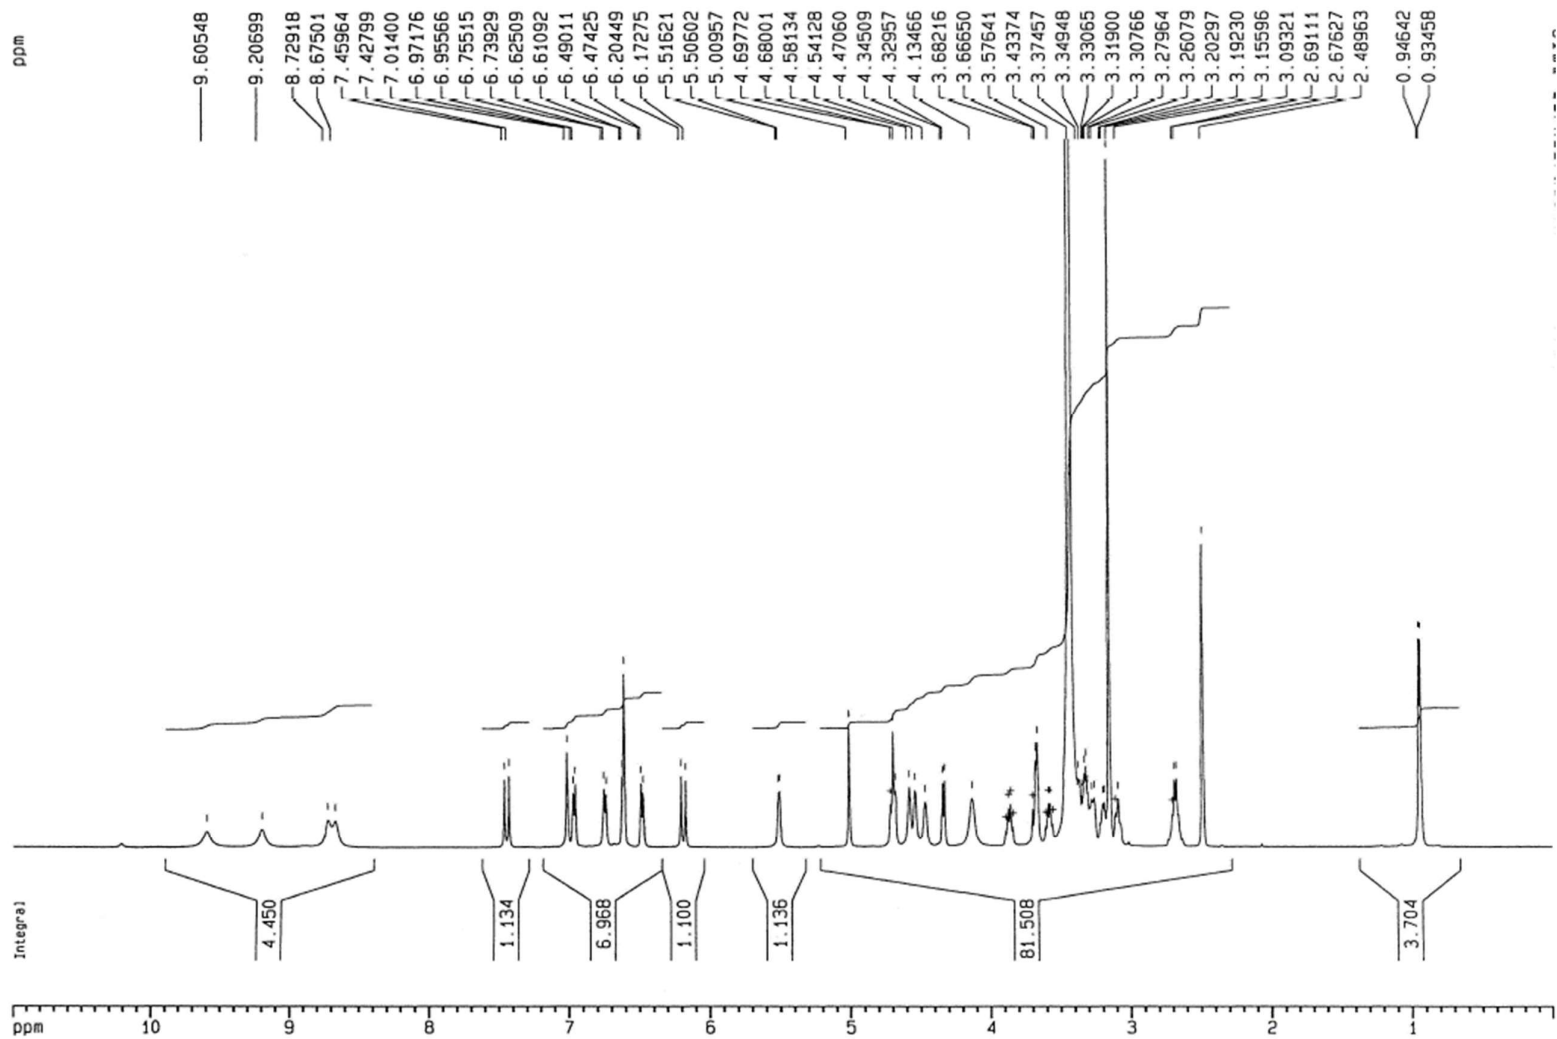

Figure 6S. The  $^1\text{H}$  NMR (500 MHz,  $\text{DMSO-d}_6$ ) data of **2**

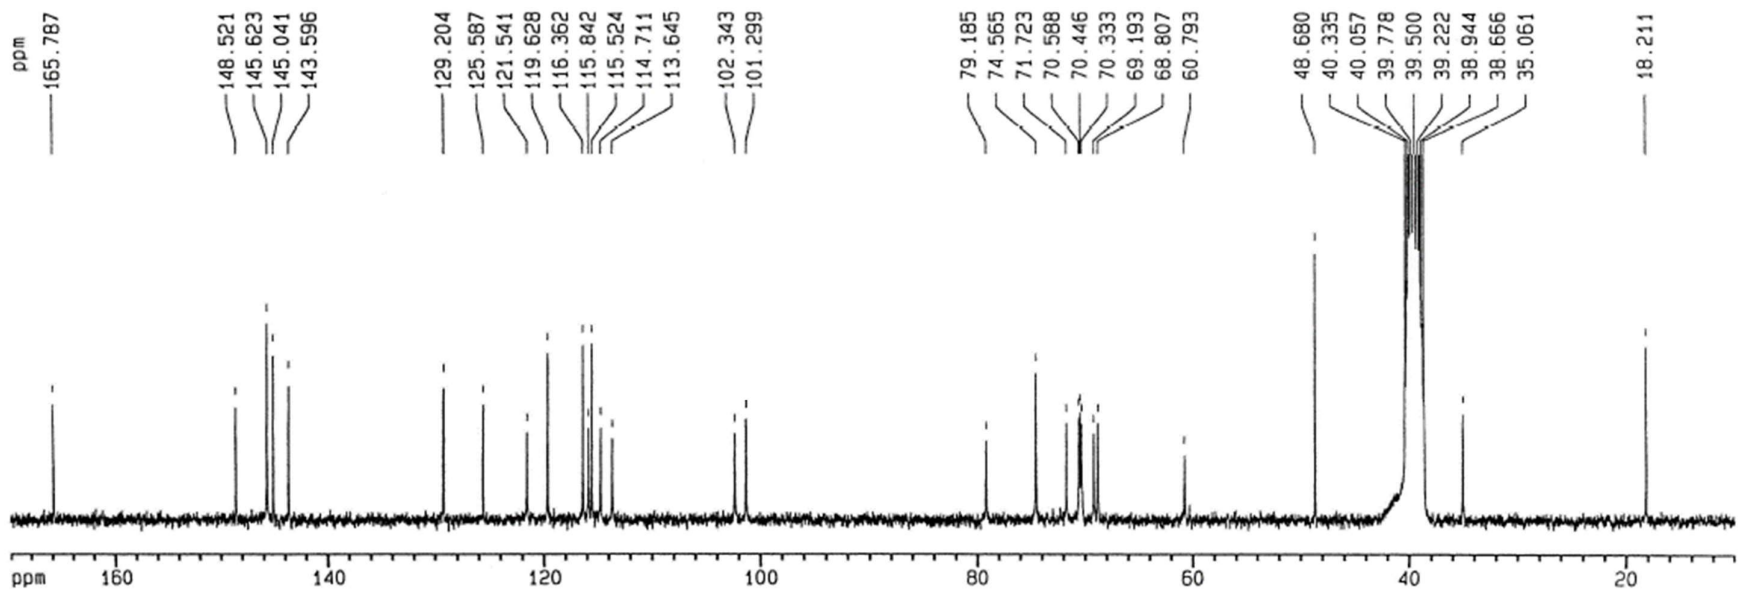

Figure 7S. The  $^{13}\text{C}$  NMR (125 MHz, DMSO- $d_6$ ) data of **2**



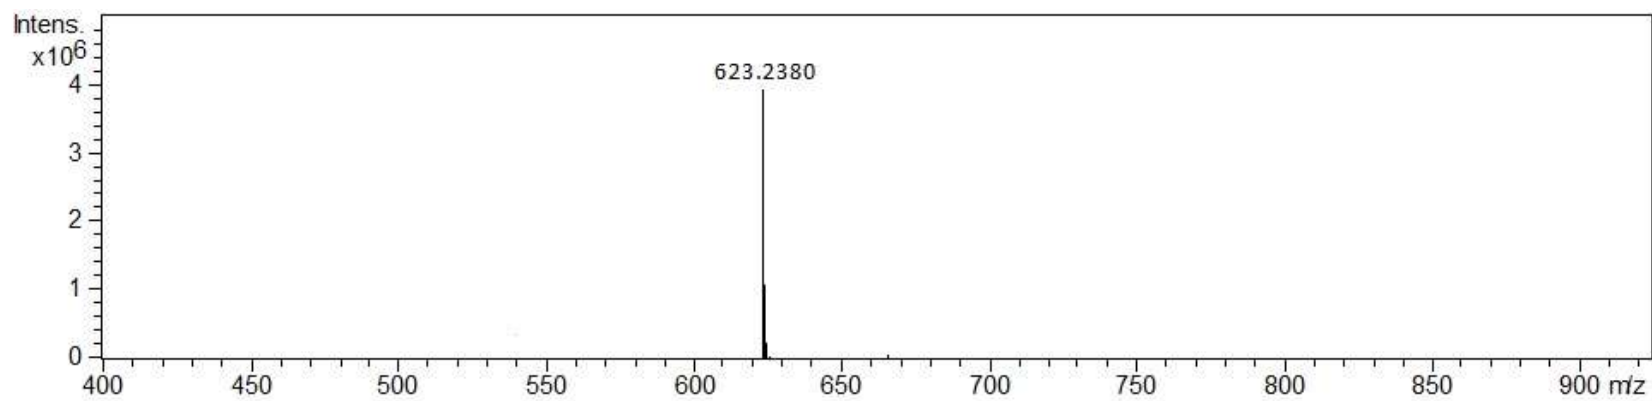

**Figure 8S.** The ESI-MS spectrum of **2**

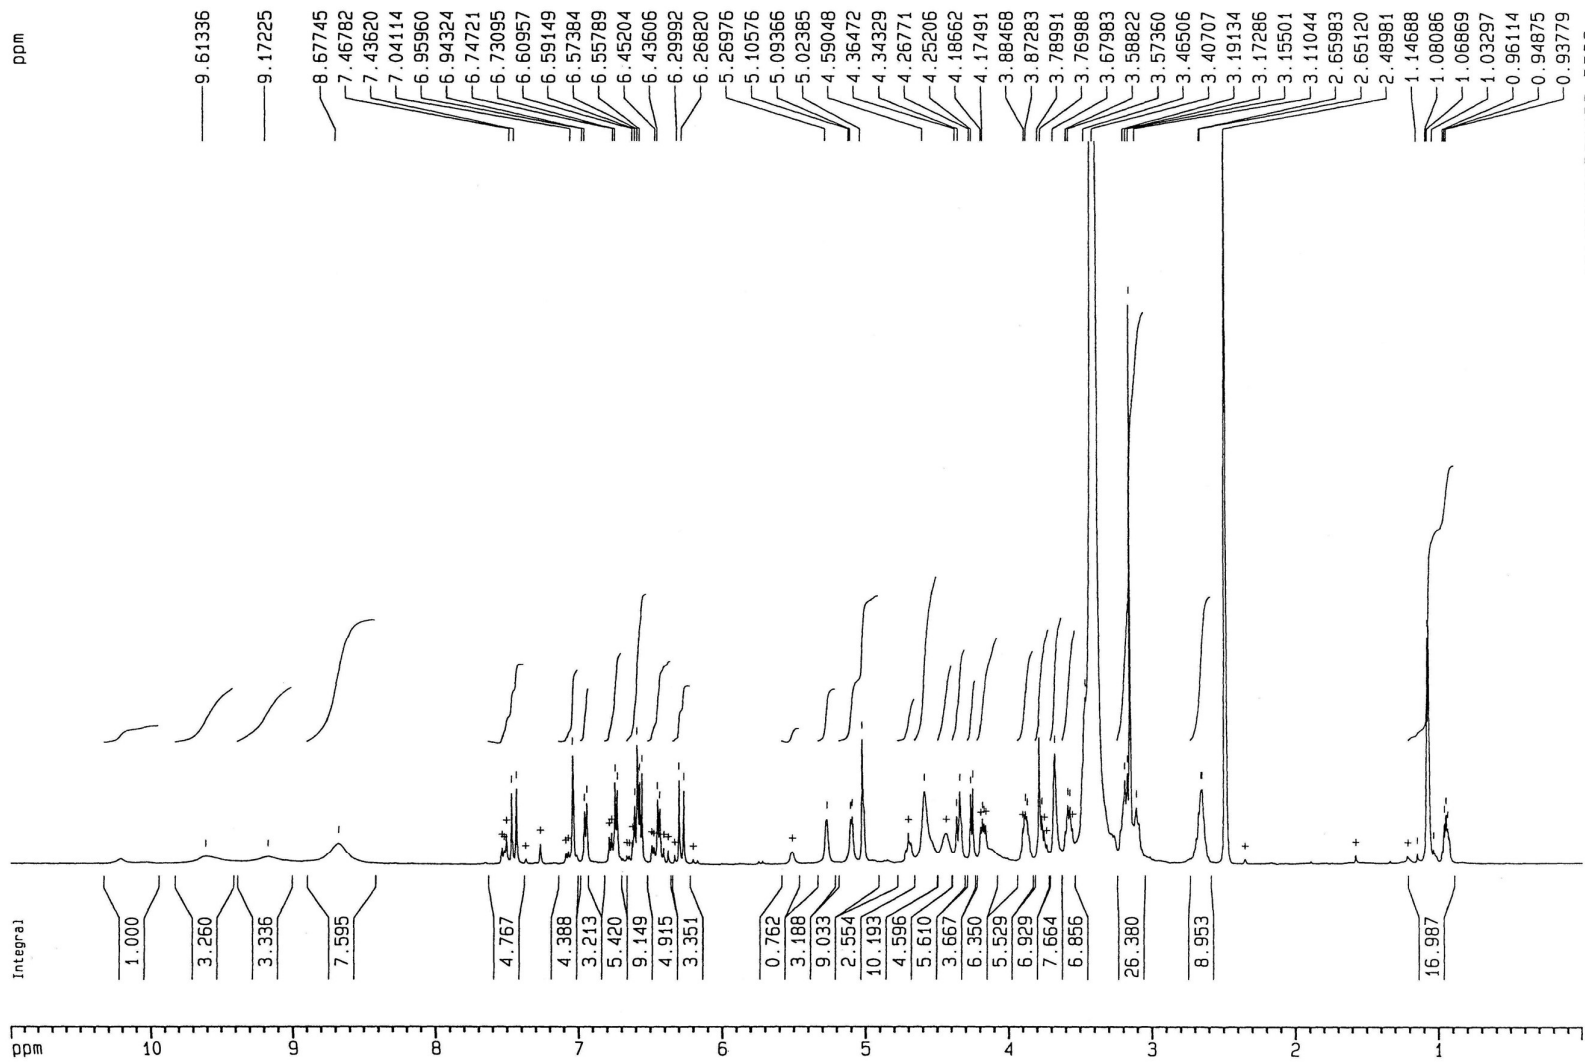

Figure 9S. The  $^1\text{H}$  NMR (500 MHz,  $\text{DMSO-d}_6$ ) data of **3**

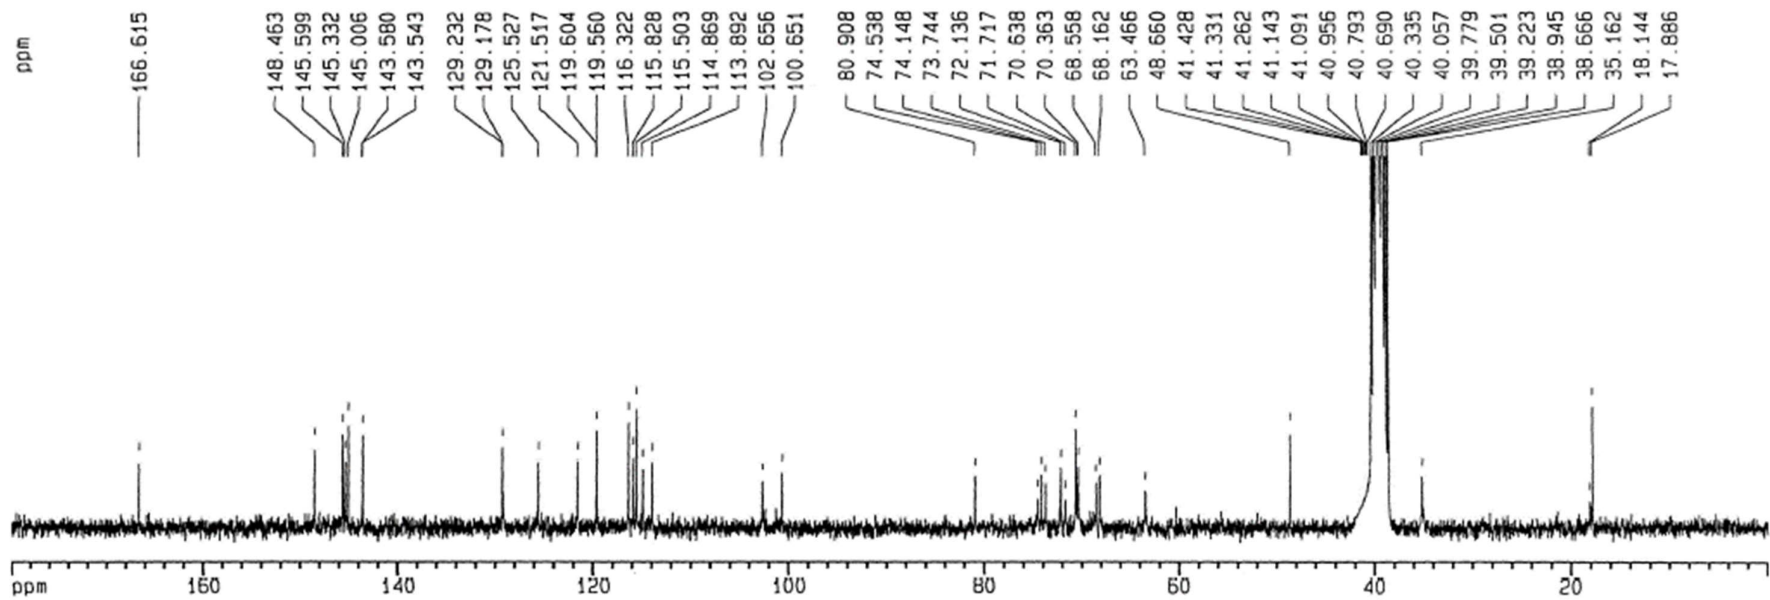

Figure 10S. The  $^{13}\text{C}$  NMR (125 MHz, DMSO- $\text{d}_6$ ) data of **3**

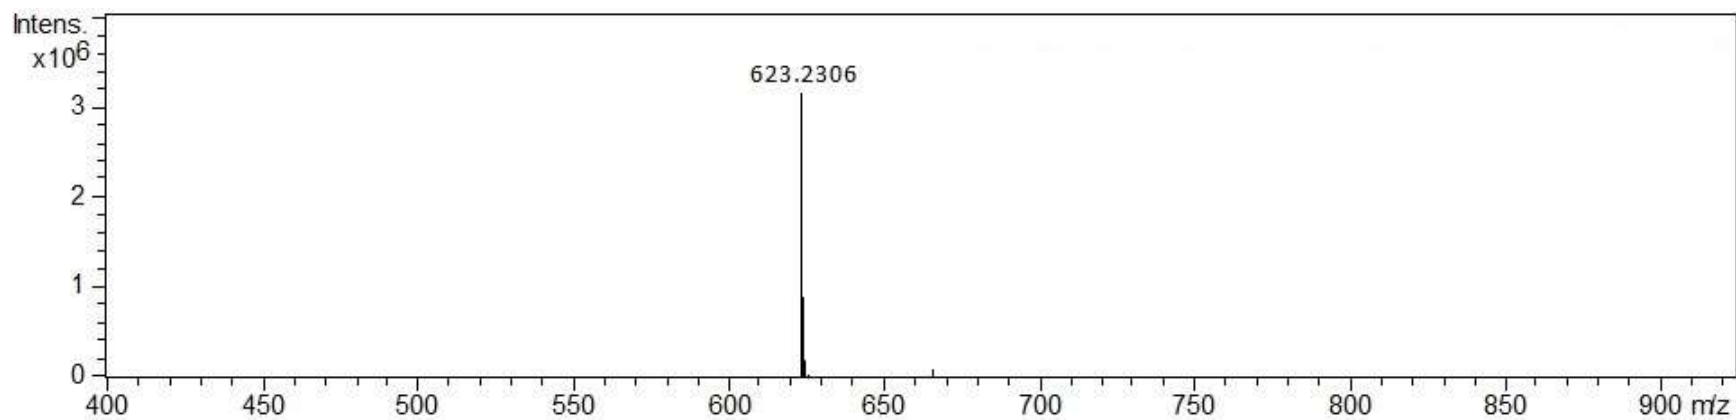

**Figure 11S.** The ESI-MS spectrum of **3**.
